# Supplementary material for: Giant negative magnetoresistance in Ni(quinoline-8-selenoate)2
Source: Royal Society of Chemistry journal article supplement (doi:10.1039/c7cp06273g), 2017-12-07
Supplement: c7cp06273g1.pdf [file c7cp06273g1.pdf]

## Giant Negative Magnetoresistance in Ni(quinoline-8-selenoate)<sub>2</sub>

Nicholas Black,<sup>a</sup> Daiki Tonouchi<sup>b</sup>, Michio M. Matsushita<sup>b,\*</sup>, J. Derek Woollins<sup>a,\*</sup>, Kunio Awaga<sup>b</sup> and Neil Robertson<sup>c\*</sup>

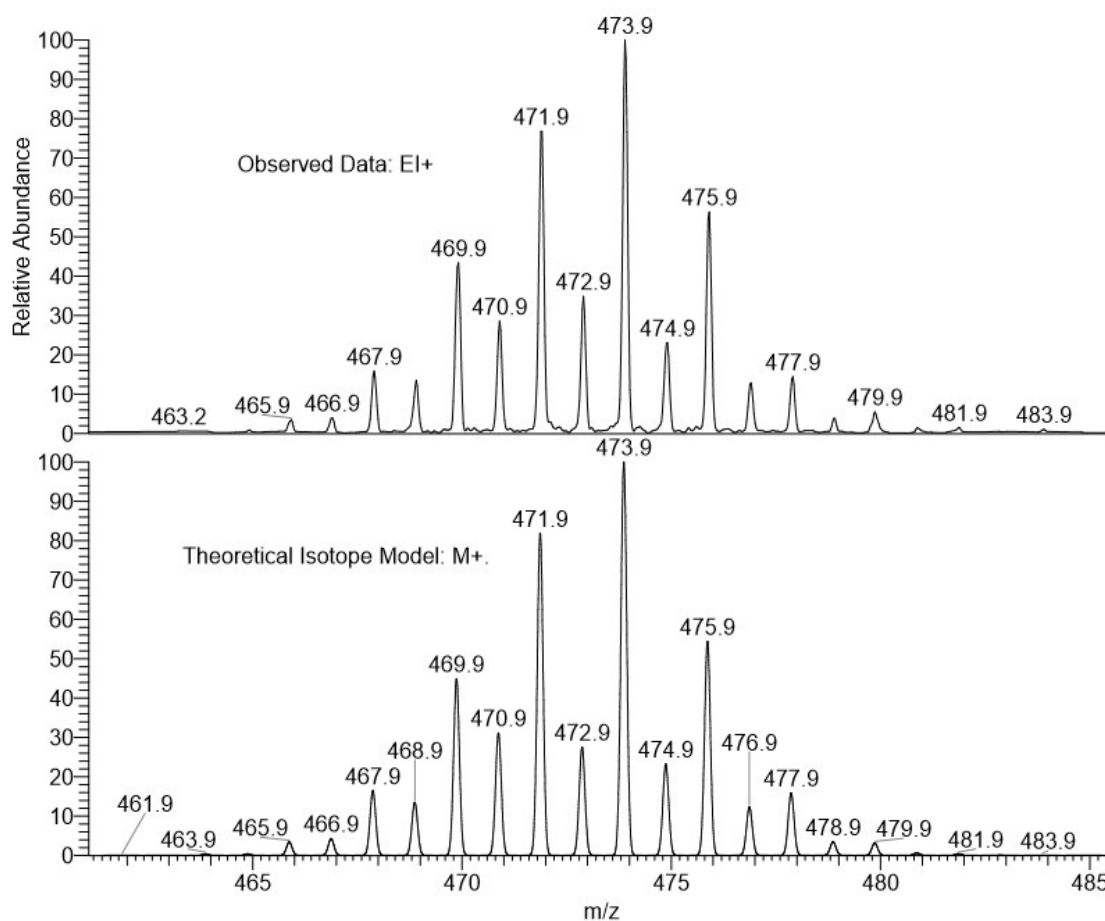

**Figure S1:** Mass spectrum of [Ni(qs)<sub>2</sub>]; acquired spectrum (top), theoretical isotope pattern (bottom).

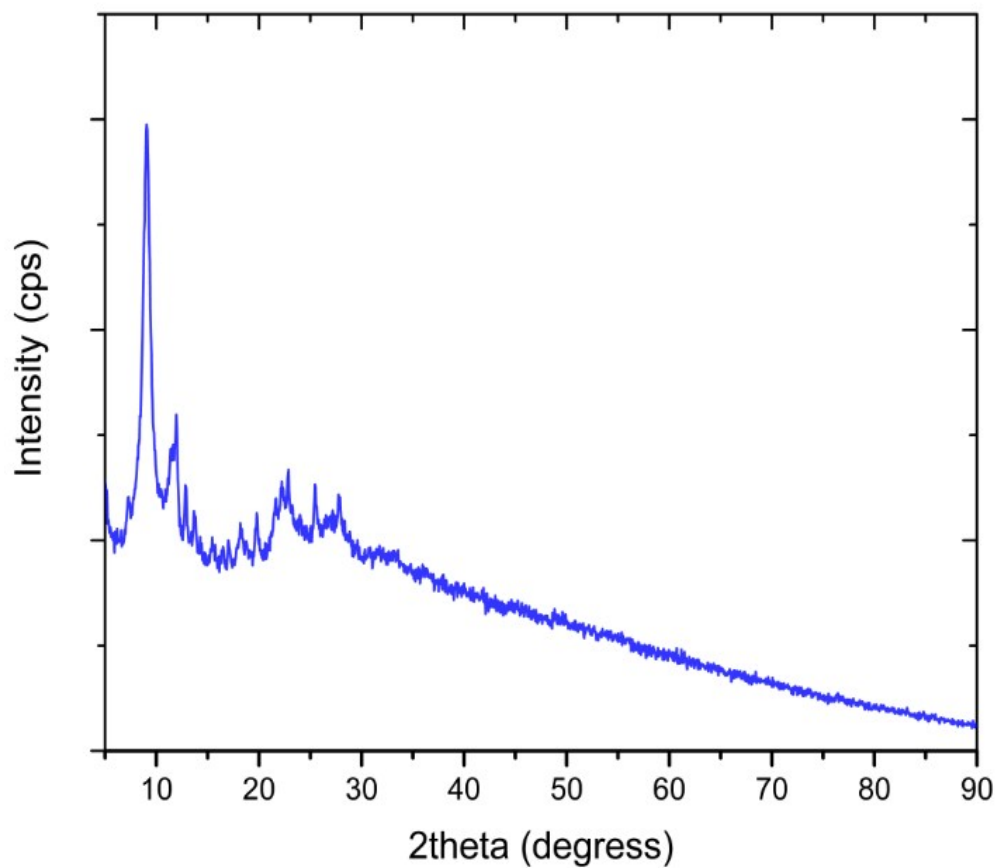

**Figure S2:** PXRD obtained for  $[\text{Ni}(\text{qs})_2]$ .

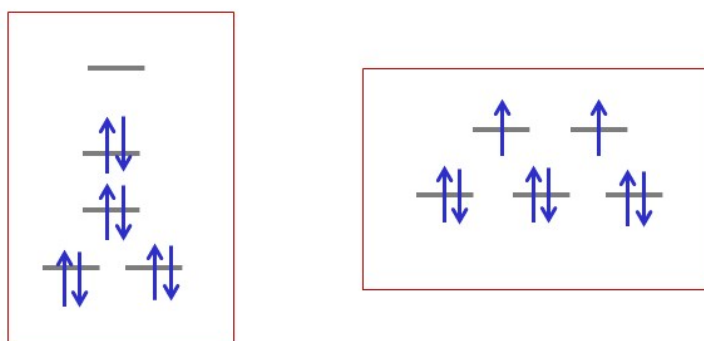

**Figure S3:** Illustration of crystal-field splitting and d-orbital occupancy for  $d^8$  Ni(II) in ideal square-planar (left) and octahedral (right) geometry, showing diamagnetic and paramagnetic character respectively.

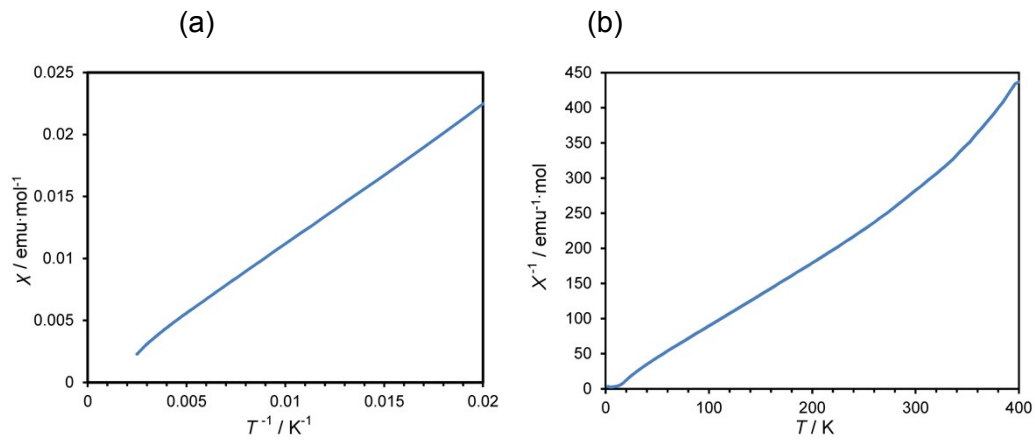

**Figure S4:**  $\chi$ - $T^{-1}$  (a) and  $\chi^{-1}$ - $T$  plot (b) of the magnetic susceptibility of  $\text{Ni}(\text{qs})_2$ . Temperature-independent component (the contribution of diamagnetic component and ferromagnetic impurity) was evaluated and subtracted by setting the intersection of the linear region of  $\chi$ - $T^{-1}$  to 0 (high-temperature approximation).

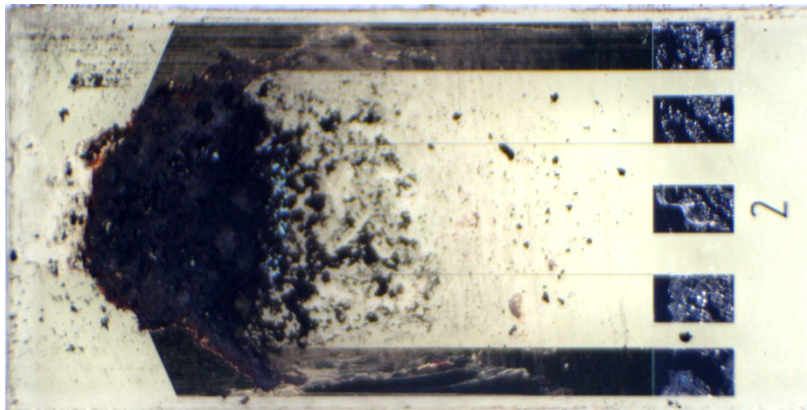

**Figure S5:** Powdered sample of  $[\text{Ni}(\text{qs})_2]$  on an interdigitated circuit used for conductivity and magnetoresistance measurements.

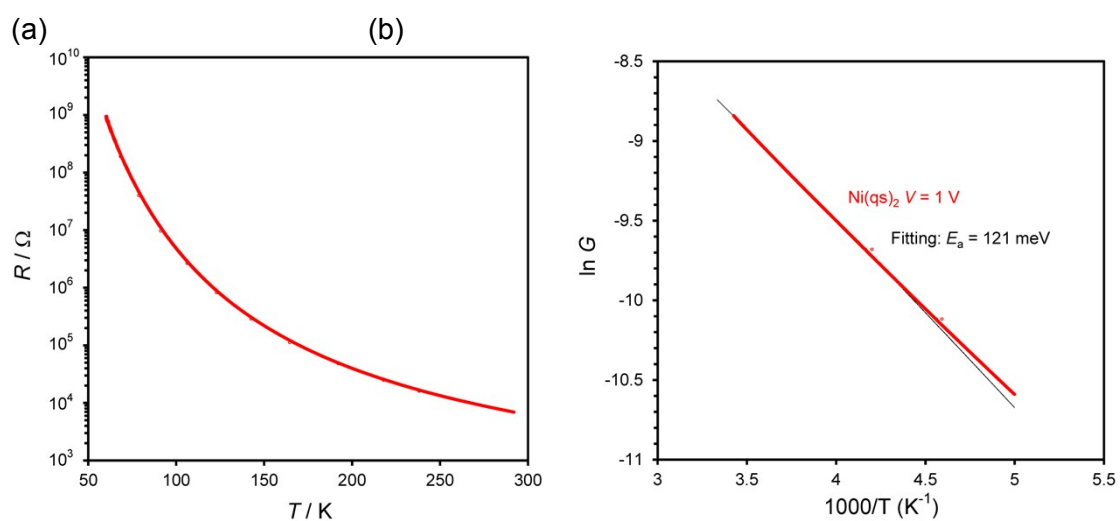

**Figure S6:** Temperature dependence of the resistance of Ni(qs)<sub>2</sub> micro-crystals deposited on a inter-digitated micro-gap electrodes (a) and the Arrhenius plot from the obtained result (b). Measurements were carried through the current-measurement with a constant applied-voltage (1V) condition. Activation energy  $E_a = 121$  meV was estimated from the Arrhenius plot between

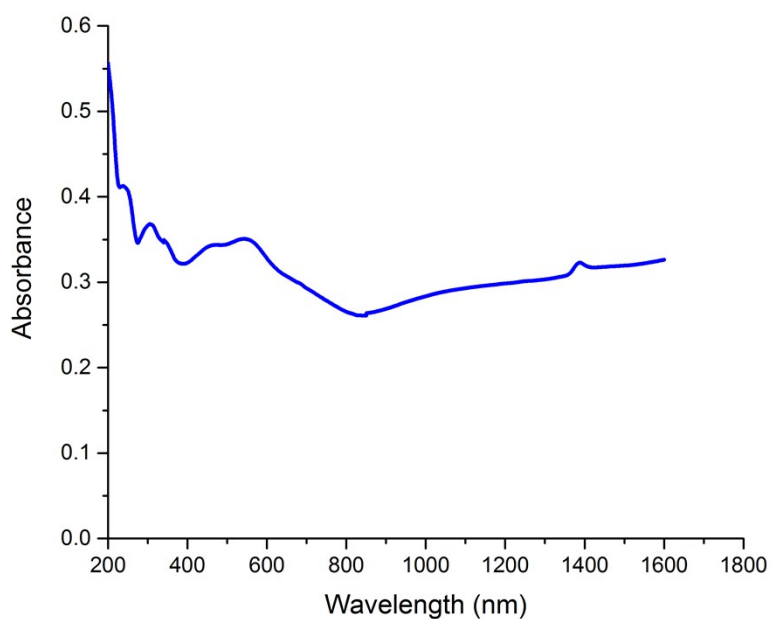

**Figure S7:** Absorbance of [Ni(qs)<sub>2</sub>] determined by diffuse reflectance spectroscopy.

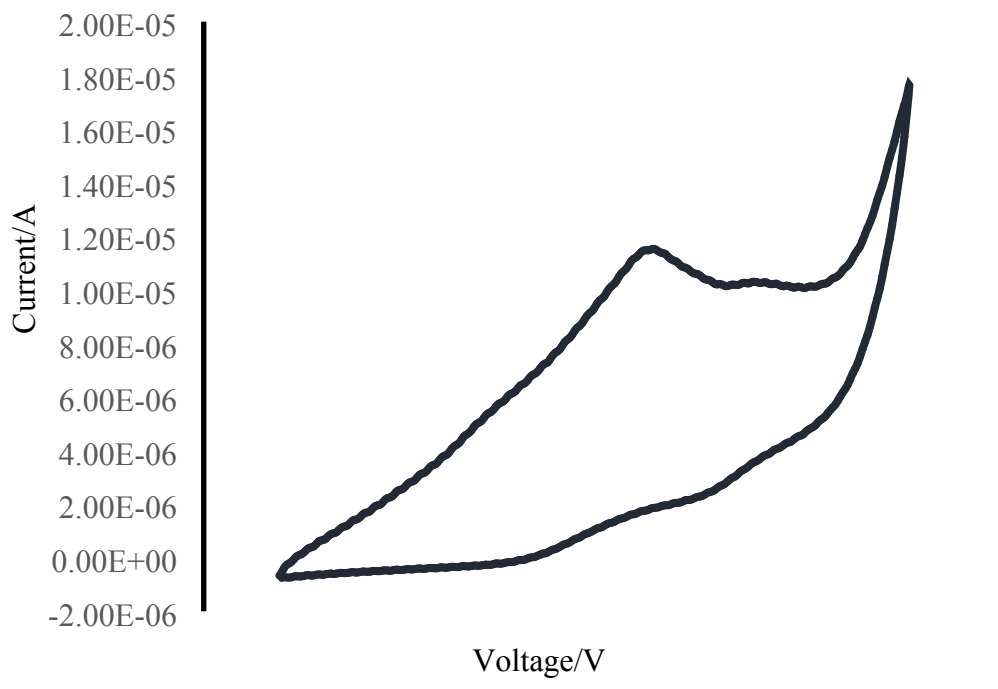

**Figure S8:** Cyclic voltammogram of solid [Ni(qs)<sub>2</sub>]. Measured in 0.1 M solution of [TBA][PF<sub>6</sub>] in acetonitrile. Sample material was pseudo-dropcast onto 3mm Pt working electrode surface and allowed to dry before measurement was made.

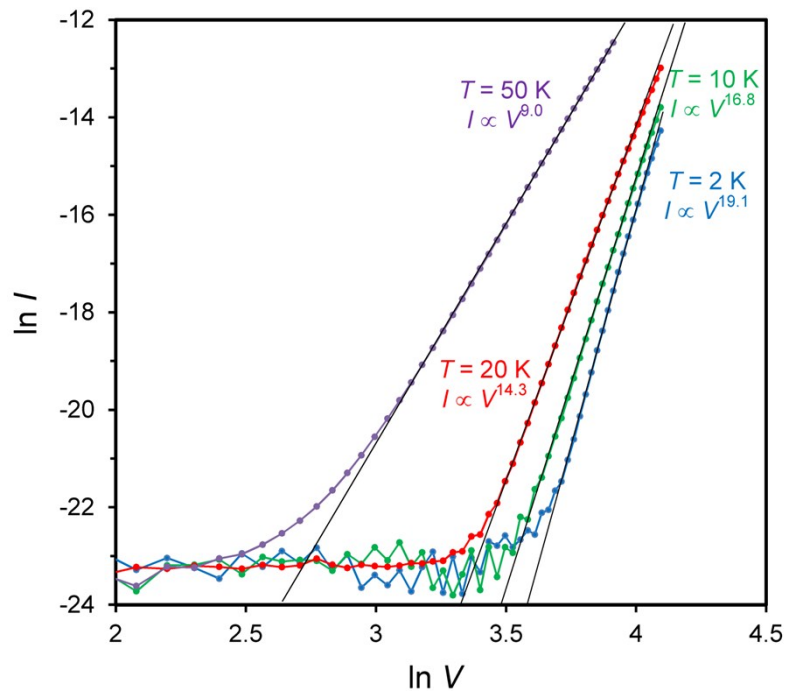

**Figure S9:** Log-log plot of the  $I$ - $V$  characteristics (Figure 3) of Ni(qs)<sub>2</sub> in the lower temperatures. The linear relation in the log-log plot means the higher-order  $I$ - $V$  characteristics.

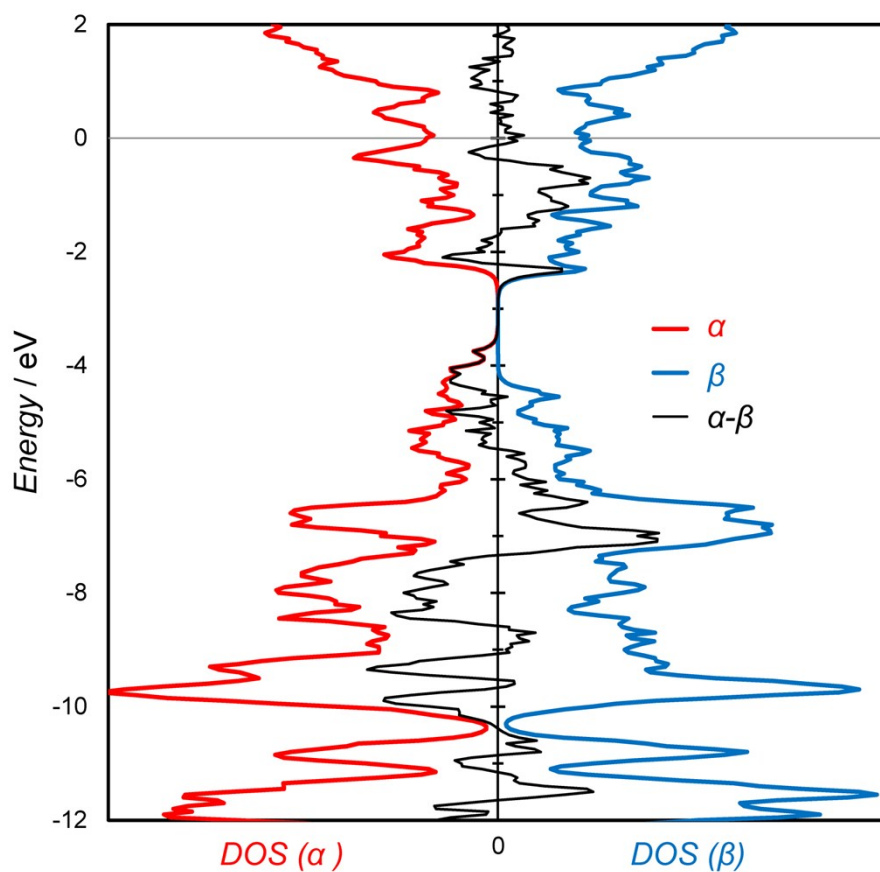

**Figure S10:** Density of states (DOSs) of the Ni(qs)<sub>2</sub> 8mer, obtained from the calculation result for Figures 5 and 6 (UB3LYP/TZVP). Occupied band edges (just below the Fermi energy, *ca.* 3eV) have big energy difference (>0.5eV) between  $\alpha$  and  $\beta$  spins. Spin-polarized transport is expected from this band structure. This big spin-polarization is caused by the local spin on Ni(II) ions.
